# Supplementary material
Source: publisher site journal article supplement (https://www.dovepress.com/article/576516)
Supplement: Supplementary file 1 [file 576516%20Revised%20Supplementary%20Material.docx]

**Supplementary Material**

**Supplementary Figure 1** Clinical manifestations of jellyfish sting around the mouth


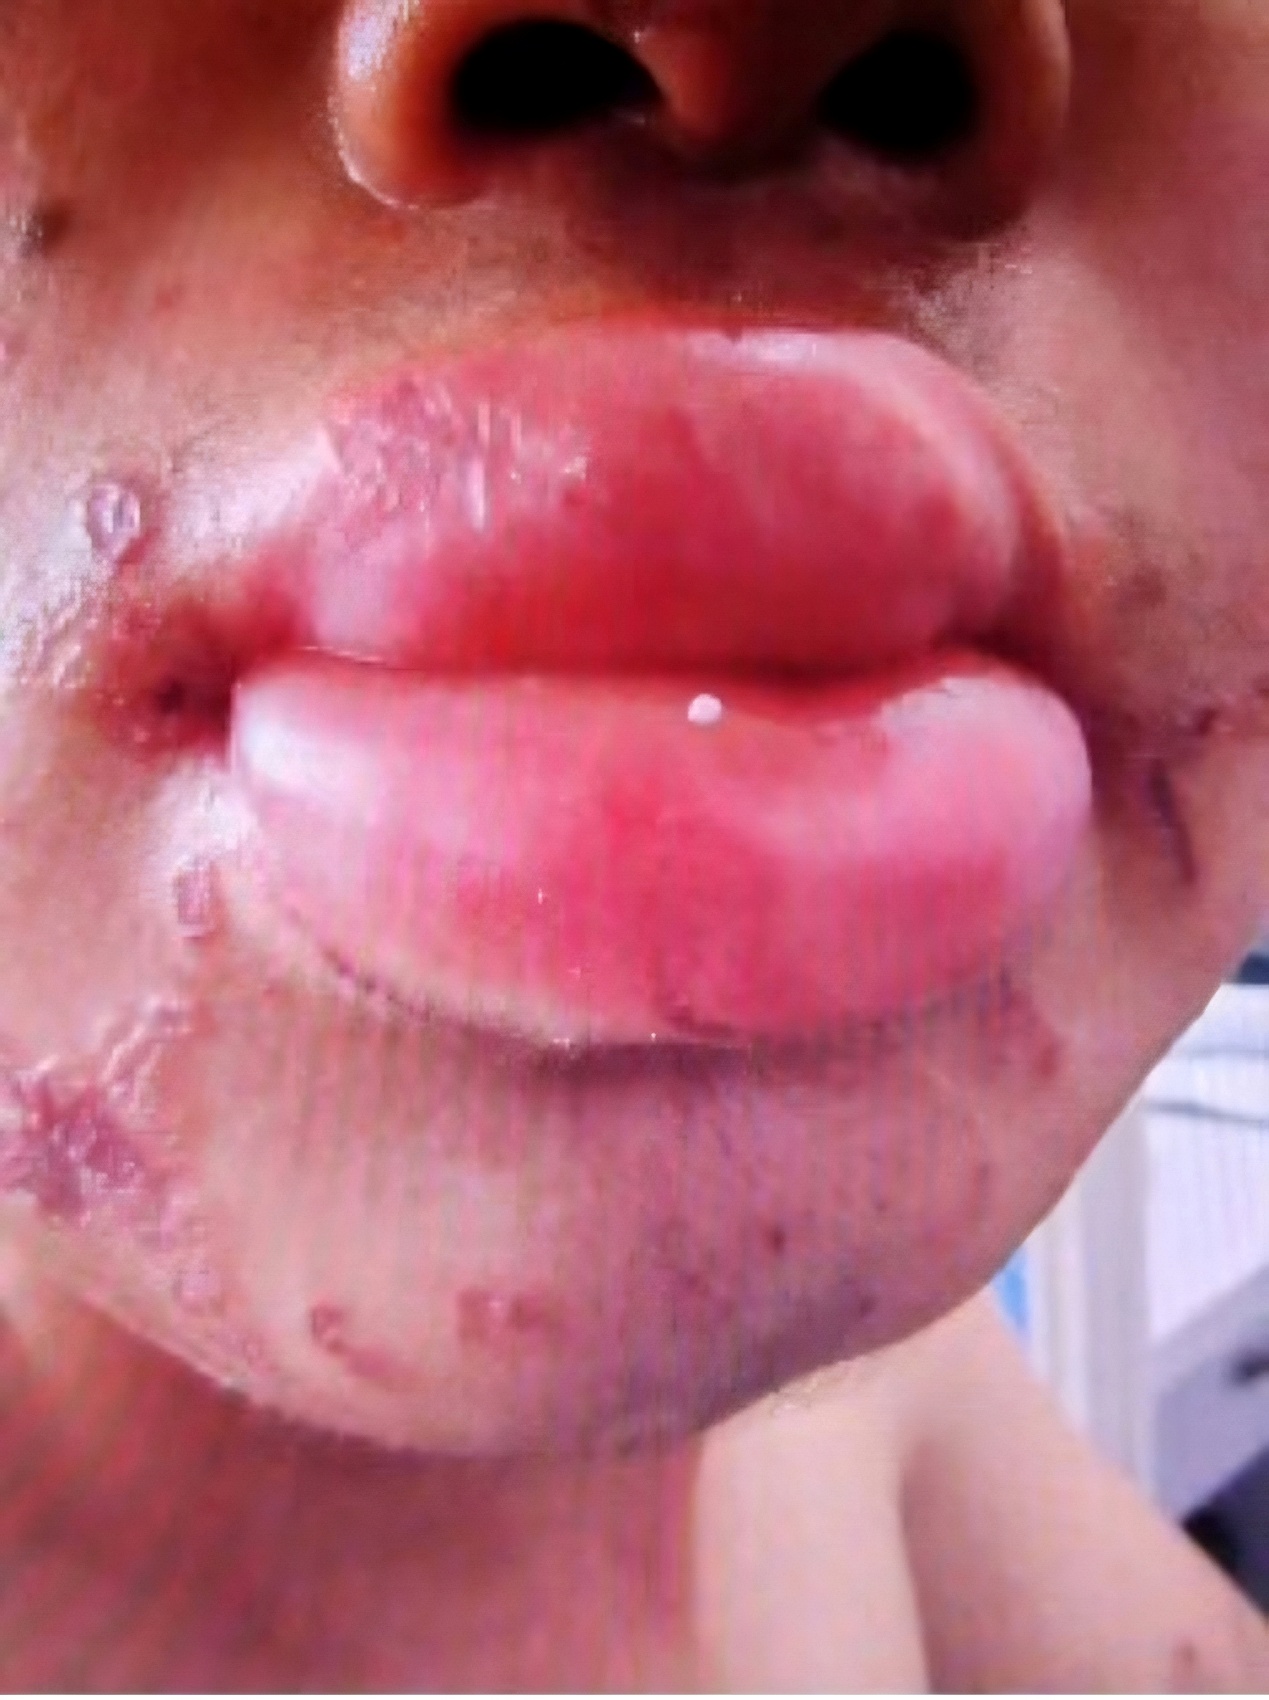


**Supplementary Figure 2** Clinical manifestations of jellyfish sting on upper limbs


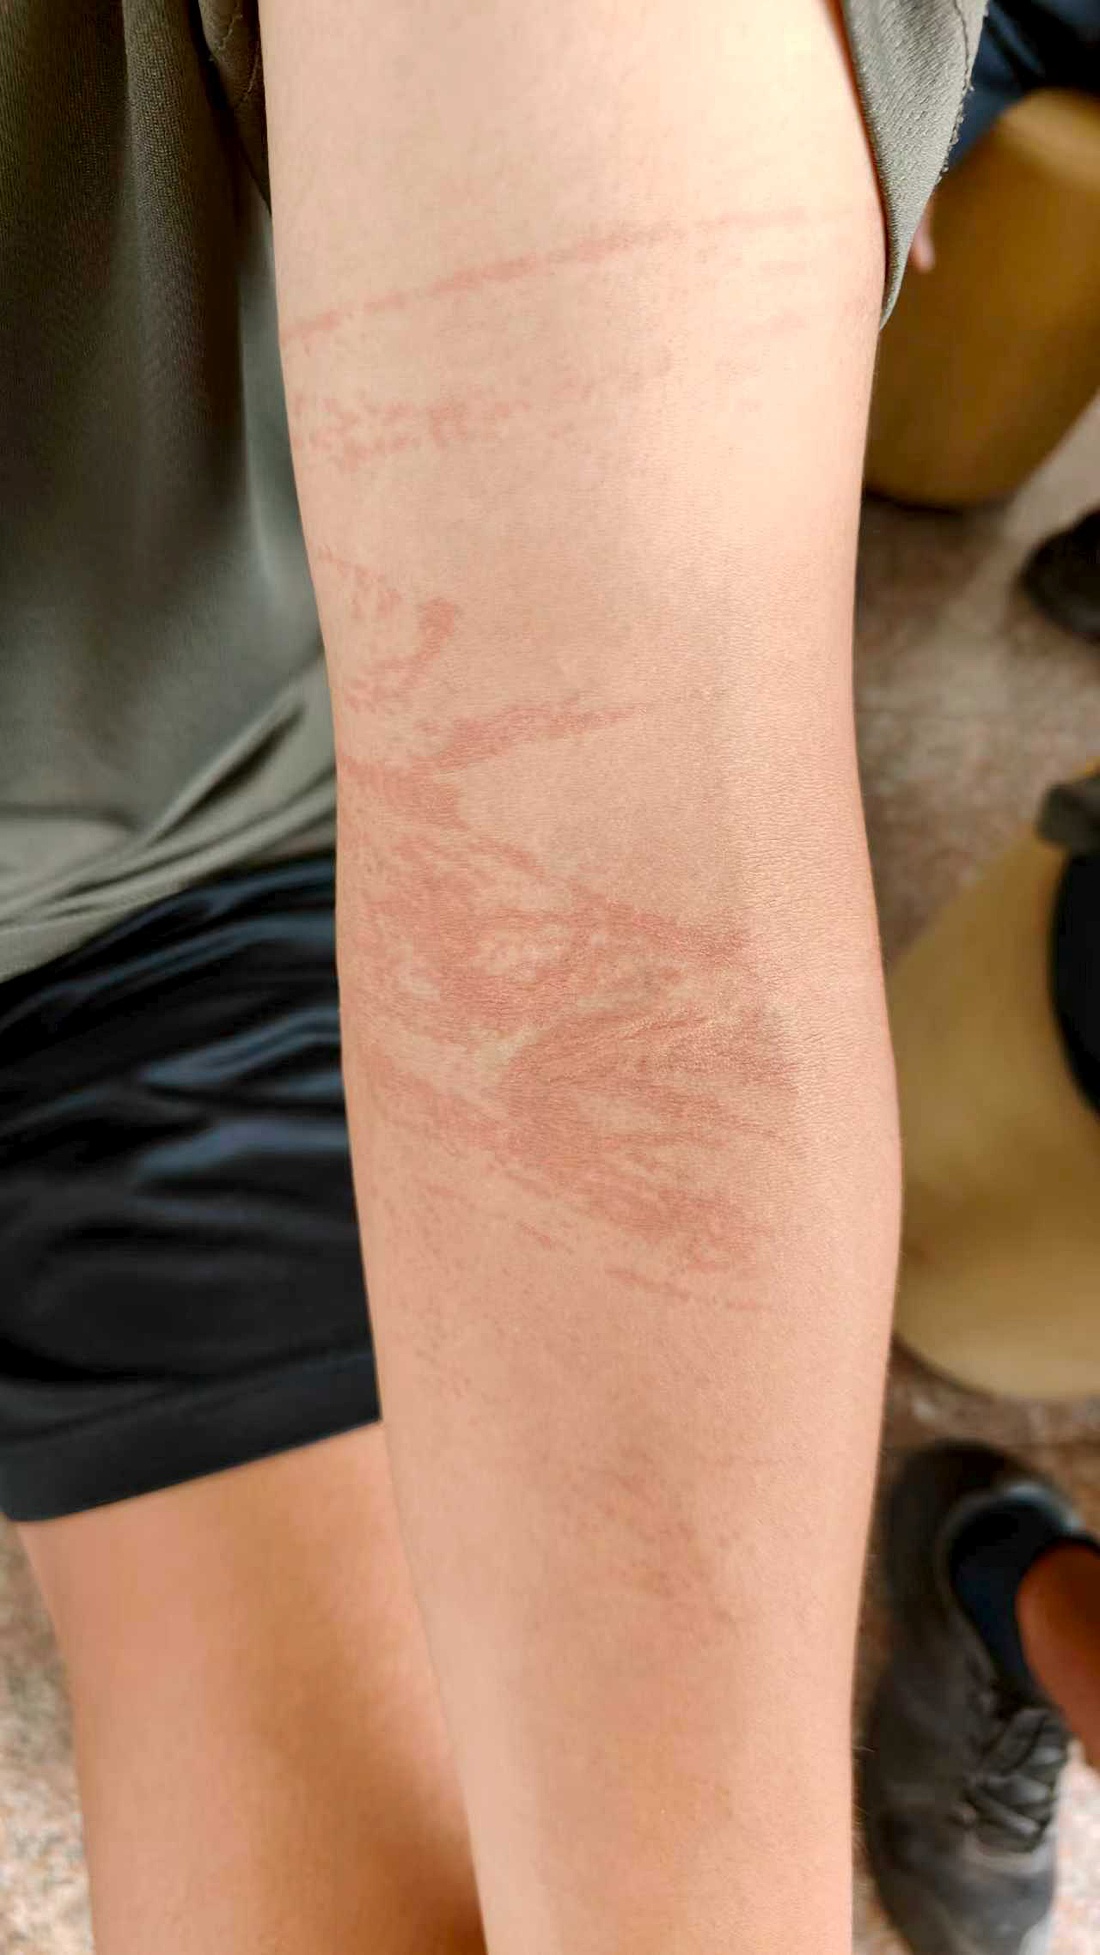


**Supplementary Table 1** Time interval from sting occurrence to receiving medical care of patients with and without skin wound infection (min)

|  | Patinets without skin wound infection (N=285) | Patinets without skin wound infection (n=285) (N=31) | t | P value |
| --- | --- | --- | --- | --- |
| Time interval from sting occurrence to receiving medical care (min) | 39.97±39.77 | 62.90±51.28 | -2.413 | 0.021 |
